# Supplementary material for: The Australian National Pollutant Inventory Fails to Fulfil Its Legislated Goals
Source: MDPI journal article supplement (doi:10.3390/ijerph14050478), 2017-05-04
Supplement: s1 [file s1]

# Supplementary Materials: The Australian National Pollutant Inventory Fails to Fulfil Its Legislated Goals

Nathan Cooper, Donna Green and Katrin J. Meissner

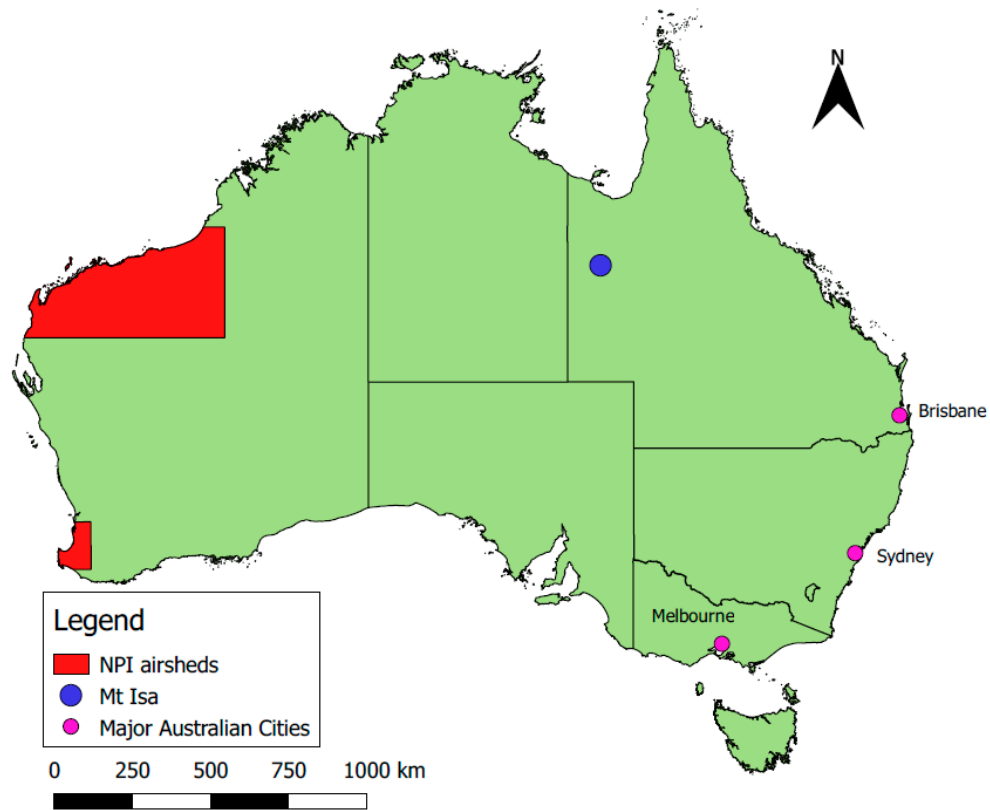

**Figure S1.** Location of greatest sources of airborne lead emissions in the 2013/14 NPI report [1-3].

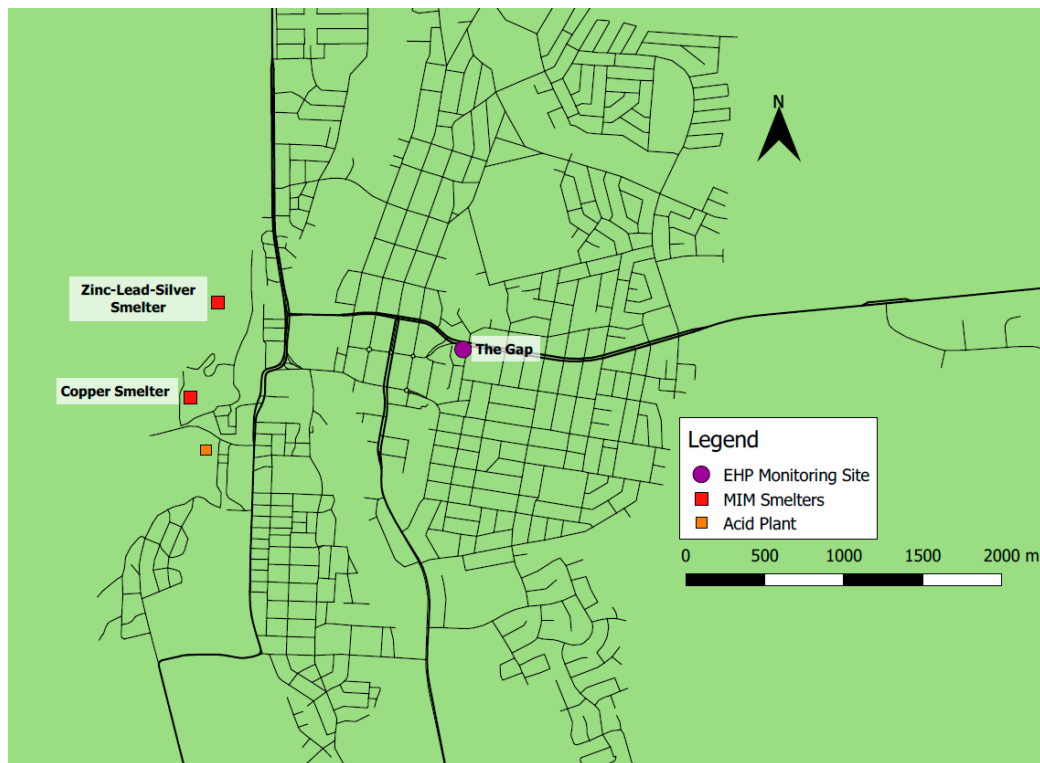

**Figure S2.** Location of MIM smelters and acid plant, and the EHP air quality monitoring station in Mt Isa, Qld [4].

**Table S1.** Methods of estimation used by Mount Isa Mines, Port Pirie Smelter and Broken Hill Mines for point and fugitive emission estimations [5].

| <b>NPI source</b>    | 7/2001-6/2002 | 7/2002-6/2003                       | 7/2003-6/2004                       | 7/2004-6/2005                 | 7/2005-6/2006 | 7/2006-6/2007                   | 7/2007-6/2008                       | 7/2008-6/2009                 | 7/2009-6/2010                 | 7/2010-6/2011                   | 7/2011-6/2012                   | 7/2012-6/2013                   | 7/2013-6/2014                       |
|----------------------|---------------|-------------------------------------|-------------------------------------|-------------------------------|---------------|---------------------------------|-------------------------------------|-------------------------------|-------------------------------|---------------------------------|---------------------------------|---------------------------------|-------------------------------------|
| MIM Pt               |               | Engineering Calculations Estimation | Engineering Calculations Estimation |                               |               | Mass Balance Estimation         | Engineering Calculations Estimation | Direct Measurement Estimation | Direct Measurement Estimation | Direct Measurement Estimation   |                                 |                                 | Engineering Calculations Estimation |
| MIM Fugitive         |               |                                     |                                     |                               |               |                                 | Engineering Calculations Estimation | Direct Measurement Estimation | Direct Measurement Estimation | Direct Measurement Estimation   |                                 |                                 |                                     |
| Port Pirie Pt        |               | Direct Measurement Estimation       | Direct Measurement Estimation       | Direct Measurement Estimation |               | Approved Alternative Estimation | Direct Measurement Estimation       | Direct Measurement Estimation | Direct Measurement Estimation | Direct Measurement Estimation   | Direct Measurement Estimation   | Direct Measurement Estimation   | Direct Measurement Estimation       |
| Port Pirie Fugitive  |               | Direct Measurement Estimation       |                                     |                               |               |                                 |                                     |                               |                               | Approved Alternative Estimation | Approved Alternative Estimation | Approved Alternative Estimation | Approved Alternative Estimation     |
| Broken Hill Fugitive |               |                                     |                                     |                               |               |                                 |                                     |                               |                               |                                 |                                 |                                 |                                     |

| <b>Method</b>                       |            |
|-------------------------------------|------------|
| Mass Balance Estimation             | Blue       |
| Engineering Calculations Estimation | Light Blue |
| Direct Measurement Estimation       | Red        |
| Emission Factors Estimation         | Light Red  |
| Approved Alternative Estimation     | Green      |

## Document S1. Comparison of Formulas and Default Values Used to Estimate Emissions from Paved and Unpaved Roads

### Mass Speciation

**Table S2.** Mass speciation values for lead from paved and unpaved roads as listed by the NPI [1,2,6], CARB [7] and U.S. EPA [8,9], with equivalent estimates for lead emissions from paved/unpaved roads in the Pilbara and Bunbury airsheds if all other formulas and values were consistent with the original methods used (3 significant places).

| Source                   | Paved (%) | Unpaved (%) | Pilbara (kg/yr) | Bunbury (kg/yr) |
|--------------------------|-----------|-------------|-----------------|-----------------|
| NPI (original estimates) | 0.0951    | 0.0867      | 125000          | 382000          |
| CARB                     | 0.0124    | 0.0130      | 18700           | 57100           |
| U.S. EPA                 | 0.0667    | 0.0288      | 42900           | 130000          |

### Silt Loading Default Values

#### Unpaved Roads

Each U.S. State that has had silt loading samples collected and tested have their own unique State-wide silt loading default value in the absence of more locally attained data. Otherwise States are offered a more general default value listed below

**Table S3.** Default silt loading fractions for unpaved roads used by the U.S. EPA [10].

| Default value | Average value | Highest value | Lowest value |
|---------------|---------------|---------------|--------------|
| 3.9%          | 3.8%          | 7.2%          | 1.5%         |

**Table S4.** Default silt loading fractions for unpaved roads used by the NPI [6].

| Gravel roads | Dirt roads |
|--------------|------------|
| 6.4%         | 11%        |

**Table S5.** Estimates for lead emissions from unpaved roads in the Pilbara and Bunbury airsheds for default silt loading values from NPI [6] and U.S. EPA [10] if formulas and all other values were consistent with the original methods used (3 significant places).

|                                        | Bunbury        | Pilbara        |
|----------------------------------------|----------------|----------------|
| NPI original silt value applied        | 6.4%           | 11%            |
| NPI original emissions estimate        | 374000 kg/yr   | 122000 kg/yr   |
| U.S. EPA equivalent default silt value | 3.9% (default) | 7.2% (highest) |
| U.S. EPA equivalent emissions estimate | 251000 kg/yr   | 86900 kg/yr    |

#### Paved Roads

Default silt loading values for paved roads are determined by the average daily traffic (ADT) measured on a paved road, as well as the conditions of paved roads [6,11].

**Table S6.** Default silt loading fractions for paved roads used by the U.S. EPA [11].

| ADT category                                                             | <500                 | 500–5000             | 5000–10000            | >10000                                                        |
|--------------------------------------------------------------------------|----------------------|----------------------|-----------------------|---------------------------------------------------------------|
| Ubiquitous baseline                                                      | 0.6 g/m <sup>2</sup> | 0.2 g/m <sup>2</sup> | 0.06 g/m <sup>2</sup> | 0.03 g/m <sup>2</sup> , 0.015 g/m <sup>2</sup> limited access |
| Ubiquitous Winter baseline, during months with frozen precipitation      | 2.4 g/m <sup>2</sup> | 0.6 g/m <sup>2</sup> | 0.12 g/m <sup>2</sup> | 0.03 g/m <sup>2</sup> , 0.015 g/m <sup>2</sup> limited access |
| Initial peak additive contribution from application of antiskid abrasive | 2 g/m <sup>2</sup>   | 2 g/m <sup>2</sup>   | 2 g/m <sup>2</sup>    | 2 g/m <sup>2</sup>                                            |
| Days to return to baseline conditions                                    | 7                    | 3                    | 1                     | 0.5                                                           |

**Table S7.** Default silt loading fractions for paved roads used by the NPI [6].

|                       | High ADT Roads (>5000) | Low ADT Roads (<5000) |
|-----------------------|------------------------|-----------------------|
| Normal conditions     | 0.1 g/m <sup>2</sup>   | 0.4 g/m <sup>2</sup>  |
| Worst case conditions | 0.5 g/m <sup>2</sup>   | 3 g/m <sup>2</sup>    |

### Emissions Factor Formulas

All formulas for paved and unpaved roads as shown below estimate the total emissions by multiplying the calculated emissions factor with the total vehicle distance travelled. This product is multiplied to the mass speciation value of a specific chemical to estimate the emissions for that chemical (for example lead). For U.S. formulas, additional measures are applied to convert estimates from pounds to kilograms.

$$E_i = EF \times VDT \times m_i \quad (1)$$

**Formula S1.** Formula for estimating emissions from paved or unpaved roads as used by U.S. EPA and NPI.

E = Total airshed emissions of chemical *i* from paved or unpaved roads (kg/yr)

EF = Emission factor for paved or unpaved roads (kg/km or kg/mi)

VDT = Total Vehicle Distance Travelled in airshed (km/yr or mi/yr)

m = mass speciation value for chemical *i* (%)

### Unpaved roads

$$EF = \frac{k \left(\frac{S}{12}\right) \left(\frac{S}{30}\right)^{0.3}}{\left(\frac{M}{0.5}\right)^{0.3}} - C \quad (2)$$

**Formula S2.** Formula for estimating the emission factor for Total Suspended Particulate (TSP) emissions from unpaved roads used by U.S. EPA [12].

EF = emission factor (lb/mi)

k = empirical constant (lb/mi) (6.0 for TSP)

s = surface material silt content (%)

S = mean vehicle speed (mph)

M = surface material moisture content (%)

C = emissions factor for 1980's vehicle fleet exhaust, brake wear and tire wear (lb/mi)

$$EF = \frac{k \left(\frac{S}{12}\right)^{0.8} \left(\frac{AW}{3}\right)^{0.5}}{\left(\frac{M}{0.2}\right)^{0.4}} \quad (3)$$

**Formula S3.** Formula for estimating the emission factor for TSP emissions from unpaved roads used by NPI [6].

EF = Emission Factor (kg/VKT)  
 k = empirical constant (kg/VKT) (2.82 for TSP)  
 s = surface material silt content (%)  
 AW = average weight of vehicles (tonnes)  
 M = surface material moisture content (%)

Paved roads

$$EF = k(s)^{0.91} \times (AW)^{1.02} \tag{4}$$

**Formula S4.** Formula for estimating the emission factor for TSP emissions from paved roads used by U.S. EPA [11].

EF = Emission Factor (lb/mi)  
 k = empirical constant (lb/mi) (0.011 for TSP)  
 s = surface material silt content (g/m<sup>2</sup>)  
 AW = average weight of vehicles (tonnes)

$$EF = k\left(\frac{s}{2}\right)^{0.65} \times \left(\frac{AW}{3}\right)^{1.5} \tag{5}$$

**Formula S5.** Formula for estimating the emission factor for TSP emissions from paved roads used by NPI [6].

EF = Emission Factor (kg/km)  
 k = empirical constant (kg/km) (0.024 for TSP)  
 s = surface material silt content (g/m<sup>2</sup>)  
 AW = average weight of vehicles (tonnes)

**Document S2. Mass Speciation Values and Emissions Estimates for Various Chemicals Relative to Lead**

**Table S8.** Paved and Unpaved road mass speciation values for lead, cobalt, copper, manganese and zinc and their ratio relative to lead mass speciation from the paved/unpaved roads in NPI EETM [6].

| Source  | Mass Speciation Values (%) |        |        |        |        | Mass Speciation Relative to Lead |         |         |         |
|---------|----------------------------|--------|--------|--------|--------|----------------------------------|---------|---------|---------|
|         | Pb                         | Co     | Cu     | Mg     | Zn     | Co/Pb                            | Cu/Pb   | Mg/Pb   | Zn/Pb   |
| Paved   | 0.0951                     | 0.0116 | 0.0161 | 0.0795 | 0.0936 | 0.12198                          | 0.16930 | 0.83596 | 0.98423 |
| Unpaved | 0.0867                     | 0.0143 | 0.0088 | 0.0973 | 0.0605 | 0.16494                          | 0.10150 | 1.12226 | 0.69781 |

*Tasmania*

**Table S9.** Paved/Unpaved road emissions estimates for lead, cobalt, copper, manganese and zinc and their ratio of emissions relative to lead emissions/mass speciation from the Launceston and Hobart airsheds, Tasmania [5].

| Source     | Emissions Estimates (kg/yr) |        |        |        |        | Emissions Relative to Lead |         |         |         |
|------------|-----------------------------|--------|--------|--------|--------|----------------------------|---------|---------|---------|
|            | Pb                          | Co     | Cu     | Mg     | Zn     | Co/Pb                      | Cu/Pb   | Mg/Pb   | Zn/Pb   |
| Launceston | 491.96                      | 59.96  | 82.86  | 410.99 | 484.14 | 0.12188                    | 0.16843 | 0.83541 | 0.98409 |
| Hobart     | 949.59                      | 115.80 | 160.76 | 793.76 | 934.65 | 0.12195                    | 0.16930 | 0.83589 | 0.98427 |

## Victoria

**Table S10.** Paved/Unpaved road emissions estimates for lead, cobalt, copper, manganese and zinc and their ratio of emissions relative to lead emissions from the Port Philip Region (PPR) airshed, Victoria [5].

| Source | Emissions Estimates (kg/yr) |    |         |         |        | Emissions Relative to LEAD |          |          |         |
|--------|-----------------------------|----|---------|---------|--------|----------------------------|----------|----------|---------|
|        | Pb                          | Co | Cu      | Mg      | Zn     | Co/Pb                      | Cu/Pb    | Mg/Pb    | Zn/Pb   |
| PPR    | 8,490.8                     | 0  | 2,280.8 | 2,280.8 | 654.88 | 0                          | 0.268617 | 0.268617 | 0.07713 |

## South Australia

**Table S11.** Paved/Unpaved road emissions estimates for lead, cobalt, copper, manganese and zinc and their ratio of emissions relative to lead emissions from the Adelaide airshed, South Australia [5].

| Source   | Emissions Estimates (kg/yr) |    |         |        |         | Emissions Relative to Lead |          |          |          |
|----------|-----------------------------|----|---------|--------|---------|----------------------------|----------|----------|----------|
|          | Pb                          | Co | Cu      | Mg     | Zn      | Co/Pb                      | Cu/Pb    | Mg/Pb    | Zn/Pb    |
| Adelaide | 1,273.0                     | 0  | 2,615.4 | 711.35 | 1,064.9 | 0                          | 2.054576 | 0.558815 | 0.836572 |

**Document S3 Variables Influencing Airborne Emissions from MIM***Air Quality Control Centre (AQCC)*

The AQCC has an alert process when weather conditions are likely to cause hazardous levels of airborne lead, sulphur dioxide and other chemicals [13]. The AQCC alert process has four stages: unrestricted operations, standby, reduced operations (partial shutdown) and total shutdown. Data from XMIM listing the number of hours that MIM operations were halted do not differentiate between total and partial shutdown [3,14–18]. Xstrata's 2012 report for North Queensland acknowledged that the number of hours the copper smelter had been partially or totally shutdown for was exaggerated by including hours on standby, with the corrected number of hours in brackets. It is not known whether this was the case for the copper smelter for previous years, or for the lead smelter as Xstrata's 2012 report only reported on Xstrata's copper operations. The figure for 2015 comes from the Mt Isa Mines website, and did not differentiate between the lead and copper smelters [19].

**Table S12.** Number of hours the lead and copper smelters at MIM were either on total or partial shutdown each year.

| Year | Lead Smelter (hrs) | Copper Smelter (hrs) | Total (hrs) |
|------|--------------------|----------------------|-------------|
| 2006 | 200                | 654                  | 854         |
| 2007 | 294                | 1050                 | 1344        |
| 2008 | 385                | 1021                 | 1406        |
| 2009 | 482                | 931                  | 1413        |
| 2010 | 536                | 889                  | 1425        |
| 2011 | 607                | 868 (316)            | 1475 (923)  |
| 2012 | NA                 | 787                  | NA          |
| 2015 | NA                 | NA                   | 1829        |

*Fuels Combusted***Table S13.** Total material usage of diesel, unleaded fuel, LPG and Wood from MIM from 2007–2011 [46, 57–60].

| Year | Diesel (kL) | Unleaded (kL) | LPG (kL) | Wood (t) |
|------|-------------|---------------|----------|----------|
| 2007 | 45,655      | 138           | 343      | 1,867    |
| 2008 | 60,283.85   | 89.58         | 65       | 120      |
| 2009 | 71,430      | 167           | 525      | 206      |
| 2010 | 51,602      | 278           | 578      | 278      |

### Lead Production

Lead production figures came from XMIM sustainability reports [46, 57-60] and Glencore Production Reports [20-22]. For the year 2011, different figures for lead production were given by the annual Glencore production report and the Xstrata sustainability report. Both are included in Table S14, with the figure from the Xstrata sustainability report included in brackets.

**Table S14.** Amount of lead bullion mined per year at Mt Isa Mines.

| Year | Lead in Bullion (Mt) | Zinc-Lead Ore Mined (Million t) |
|------|----------------------|---------------------------------|
| 2007 | 125.2                | 5.12                            |
| 2008 | 166.9                | 6.4                             |
| 2009 | 146.0                | 7.4                             |
| 2010 | 140.1                | 8.6                             |
| 2011 | 130.7 (138.7)        | 9.1                             |
| 2012 | 153.1                | NA                              |
| 2013 | 167.8                | NA                              |
| 2014 | 170.2                | NA                              |

### References

1. Sinclair Knight Merz. *Aggregated Emissions Inventory of NPI Substances for the Bunbury Regional Airshed*; Sinclair Knight Merz: Perth, Australia, 2003.
2. Sinclair Knight Merz. *Aggregated Emissions Inventory for the Pilbara Airshed 1999/2000*; Sinclair Knight Merz: Perth, Australia, 2003.
3. Xstrata Mt Isa Mines. *Xstrata Mount Isa Mines: Sustainability Report 2011*; Xstrata Mt Isa Mines: Brisbane, QLD, 2011.
4. Department of Science, Information Technology, Innovation and the Arts. *Air Quality Bulletin—North Queensland July 2014*; Department of Science, Information Technology, Innovation and the Arts: Brisbane, Australia, 2014.
5. National Pollutant Inventory. NPI data. Available online: <http://www.npi.gov.au/npi-data/search-npi-data> (accessed on 17 December 2016). Data published and made available under a Creative Commons Attribution 4.0 International Public Licence: <https://creativecommons.org/licenses/by/4.0/legalcode>
6. National Pollutant Inventory. *Emissions Estimation Technique Manual for Aggregated Emissions from Paved and Unpaved Roads*; Environment Australia: Canberra, 1999.
7. California Air Resources Board. Paved and Unpaved Road Dust PM Profiles. Available online: <https://www.arb.ca.gov/ei/speciate/roaddust.htm> (accessed on 8 February 2016).
8. United States Environmental Protection Agency. SPECIATE Data Browser: Unpaved Road Dust-Composite. Available online: <https://cfpub.epa.gov/si/speciate/> (accessed on 15 February 2016).
9. United States Environmental Protection Agency. SPECIATE Data Browser: Paved Road Dust-Composite. Available online: <https://cfpub.epa.gov/si/speciate/> (accessed on 15 February 2016).
10. U.S. Environmental Protection Agency. Unpaved Road Surface Material Silt Content Values Used in the 1999 NEI. Available online: <https://www3.epa.gov/ttn/chief/ap42/ch13/related/c13s02-2.html> (accessed on 15 February 2016).
11. U.S. Environmental Protection Agency. *Fifth Edition Compilation of Air Pollutant Emission Factors, Volume 1: Stationary Point and Area Sources*; U.S. Environmental Protection Agency: Washington, DC, USA, 2011.
12. U.S. Environmental Protection Agency. *Fifth Edition Compilation of Air Pollutant Emission Factors, Volume 1: Stationary Point and Area Sources*, U.S. Environmental Protection Agency: Washington, DC, USA, 2006.
13. Mount Isa Mines. Air Quality in Mt Isa: Community information about sulphur dioxide management at Mount Isa Mines, Mount Isa Mines: Mount Isa, Australia, 2016.



14. Xstrata. *Xstrata Cooper North Queensland Operations: Sustainability Report 2012*, Xstrata: Brisbane, Australia, 2012.
15. Xstrata Mount Isa Mines. *Xstrata Mount Isa Mines: Sustainability Report 2010*, Xstrata Mount Isa Mines: Brisbane, Australia, 2010.
16. Xstrata Mount Isa Mines. *Xstrata Mount Isa Mines: Sustainability Report 2009*, Xstrata Mount Isa Mines: Brisbane, Australia, 2009.
17. Xstrata Mount Isa Mines. *Xstrata Mount Isa Mines: Sustainability Report 2008*, Xstrata Mount Isa Mines: Brisbane, Australia, 2008.
18. Xstrata Mount Isa Mines. *Xstrata Mount Isa Mines: Sustainability Report 2007*, Xstrata Mount Isa Mines: Brisbane, Australia, 2007.
19. Mount Isa Mines 2016. Air Quality in Mt Isa Portal. Available online: <http://www.mountisamines.com.au/EN/sustainability/Pages/AirqualityinMountIsa.aspx> (accessed on 26 April 2016).
20. Glencore. *Production Report for the 12 months ended 31 December 2014*; Glencore: Baar, Switzerland, 2015.
21. GlencoreXstrata. *Production Report for the 12 months ended 31 December 2013*; GlencoreXstrata: Baar, Switzerland, 2014.
22. Glencore. *Production Report for the 12 months ended 31 December 2012*; Glencore: Baar, Switzerland, 2013.

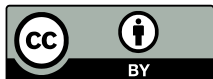

© 2017 by the authors; licensee MDPI, Basel, Switzerland. This article is an open access article distributed under the terms and conditions of the Creative Commons by Attribution (CC-BY) license (<http://creativecommons.org/licenses/by/4.0/>).
